# Supplementary material for: Out of Tanganyika: Genesis, explosive speciation, key-innovations and phylogeography of the haplochromine cichlid fishes
Source: PubMed Central journal article supplement (PMC554777; doi:10.1186/1471-2148-5-17), 2005-02-21
Supplement: 1471-2148-5-17-S1.pdf [file 1471-2148-5-17-S1.pdf]

**Table 1. Specimen information, geographic origin and GenBank accession numbers of all taxa included in this study.** This table lists the species and tribe names, geographic origin, source of specimens, names of collectors and collection numbers (if available), and GenBank accession numbers for both mitochondrial gene segments. The taxa that are included in Fig. 3 are marked by a circle, specific taxon labels in Fig. 3 are depicted in the "Label" column. The clade names according to Figs. 2 and 3 are shown in the last column. Tribe names are according to Poll [7].

abbreviations: Aa... Astatoreochromis alluaudi lineage, CSA... Congolese/South African lineage, LMF... Lake Malawi species flock, LVS... Lake Victoria Region Superflock, MO... Malagarasi Orthochromis assemblage, EAR... East African riverine cichlids, Ps... Pseudocrenilabrus lineage, Tr... Tropheini, LT... Lake Tanganyika species flock

| * * * * * Taxonomy * * * * * |                                  | * * * * * Sample Information * * * * * |                                                        |                               | * GenBank accession number |          |        |       |       |
|------------------------------|----------------------------------|----------------------------------------|--------------------------------------------------------|-------------------------------|----------------------------|----------|--------|-------|-------|
| Tribe                        | Taxon                            | Origin                                 | Source                                                 | Collector (Collection Number) | control region             | ND2      | Fig. 2 | Label | Clade |
| Cyprichromini                | <i>Cyprichromis</i> sp. "Jumbo"  | Lake Tanganyika                        | Salzburger et al. 2002 [9]                             | n/a                           | AF400699                   | AF398224 | *      |       | LT    |
|                              | <i>Paracyprichromis brieri</i>   | Lake Tanganyika                        | Salzburger et al. 2002 [9]                             | n/a                           | AF400700                   | AF398223 | *      |       | LT    |
| Ectodini                     | <i>Ectodus descampsi</i>         | Lake Tanganyika                        | Salzburger et al. 2002 [9]/Koblmüller et al. 2004 [35] | n/a                           | AF400703                   | AY337790 | *      |       | LT    |
|                              | <i>Xenotilapia sima</i>          | Lake Tanganyika                        | Salzburger et al. 2002 [9]/Kocher et al. 1995 [15]     | n/a                           | AF400706                   | U07270   | *      |       | LT    |
| Eretmodini                   | <i>Eretmodus cyanostictus</i>    | Lake Tanganyika                        | Salzburger et al. 2002 [9]                             | n/a                           | AF400707                   | AF398220 | *      |       | LT    |
|                              | <i>Spathodus erythrodon</i>      | Lake Tanganyika                        | Salzburger et al. 2002 [9]                             | n/a                           | AF400708                   | AF398218 | *      |       | LT    |
|                              | <i>Tanganicodus irsacae</i>      | Lake Tanganyika                        | Salzburger et al. 2002 [9]                             | n/a                           | AF400709                   | AF398219 | *      |       | LT    |
| Haplochromini                | <i>Astatoreochromis alluaudi</i> | Lake Victoria Region (L. Kanyaboli)    | this study                                             | R. Abila (R281-2002)          | AY929969                   | AY930075 | *      | II    | Aa    |
|                              | <i>Astatoreochromis alluaudi</i> | Lake Victoria Region                   | Nagl et al. 2000 [25]                                  | n/a                           | AF213618                   | -        |        |       | Aa    |
|                              | <i>Astatoreochromis alluaudi</i> | Lake Victoria Region (L. Kanyaboli)    | this study                                             | R. Abila (R575-2002)          | AY929997                   | -        |        |       | Aa    |
|                              | <i>Astatoreochromis alluaudi</i> | Lake Victoria Region (L. Kanyaboli)    | this study                                             | R. Abila (R192-2002)          | AY929996                   | -        |        |       | Aa    |
|                              | <i>Astatoreochromis alluaudi</i> | Lake Victoria Region (L. Kanyaboli)    | this study                                             | R. Abila (R101-2002)          | AY929966                   | AY930071 | *      | I     | Aa    |
|                              | <i>Astatoreochromis alluaudi</i> | Lake Victoria Region (L. Kanyaboli)    | this study                                             | R. Abila (R044-2002)          | AY929995                   | -        |        |       | Aa    |
|                              | <i>Astatoreochromis alluaudi</i> | Lake Victoria Region (L. Kanyaboli)    | this study                                             | R. Abila (R576-2002)          | AY929998                   | -        |        |       | Aa    |
|                              | <i>Astatoreochromis alluaudi</i> | Lake Victoria Region                   | Nagl et al. 2000 [25]                                  | n/a                           | AF213616                   | -        |        |       | Aa    |
|                              | <i>Astatotilapia burtoni</i>     | Lake Tanganyika                        | Salzburger et al. 2002 [9]/Klett & Meyer 2002 [16]     | n/a                           | AF400710                   | AF317266 | *      | I     | EAR   |
|                              | <i>Astatotilapia burtoni</i>     | Lake Tanganyika                        | this study                                             | aquarium, T62                 | AY930000                   | -        |        |       | EAR   |
|                              | <i>Astatotilapia burtoni</i>     | Lake Tanganyika                        | this study                                             | aquarium, T63                 | AY930001                   | -        |        |       | EAR   |
|                              | <i>Astatotilapia burtoni</i>     | Lake Tanganyika                        | this study                                             | aquarium, H19                 | AY929999                   | -        |        |       | EAR   |
|                              | <i>Astatotilapia burtoni</i>     | Lake Tanganyika                        | this study                                             | L. De Vos (31-02/6/92). T34   | AY929955                   | AY930060 | *      | II    | EAR   |
|                              | <i>Astatotilapia calliptera</i>  | Lake Malawi                            | this study                                             | I. Kornfield (A22)            | AY929977                   | AY930090 | *      | III   | LMF   |
|                              | <i>Astatotilapia calliptera</i>  | Lake Malawi                            | Shaw et al. 2000 [62]                                  | n/a                           | AF298938                   | AF305277 | *      | II    | LMF   |
|                              | <i>Astatotilapia calliptera</i>  | Lake Malawi                            | Shaw et al. 2000 [62]                                  | n/a                           | AF298940                   | AF305279 | *      | I     | LMF   |
|                              | <i>Astatotilapia calliptera</i>  | Lake Malawi                            | Shaw et al. 2000 [62]                                  | n/a                           | AF298941                   | -        |        |       | LMF   |
|                              | <i>Astatotilapia nubila</i>      | Lake Victoria                          | Nagl et al. 2000 [25]                                  | n/a                           | AF213524                   | -        |        |       | LVS   |
|                              | <i>Astatotilapia nubila</i>      | Lake Victoria                          | Nagl et al. 2000 [25]                                  | n/a                           | AF213536                   | -        |        |       | LVS   |
|                              | <i>Astatotilapia</i> sp.         | Lake Victoria Region (L. Kanyaboli)    | this study                                             | R. Abila (R184-2002)          | AY929967                   | AY930072 | *      | II    | LVS   |
|                              | <i>Astatotilapia</i> sp.         | Lake Victoria Region (L. Kanyaboli)    | this study                                             | R. Abila (R185-2002)          | AY930045                   | AY930073 | *      | I     | LVS   |
|                              | <i>Astatotilapia</i> sp.         | Lake Victoria Region (L. Kanyaboli)    | this study                                             | R. Abila (R183-2002)          | AY930003                   | -        |        |       | LVS   |
|                              | <i>Astatotilapia</i> sp.         | Lake Victoria Region (L. Kanyaboli)    | this study                                             | R. Abila (R182-2002)          | AY930002                   | -        |        |       | LVS   |
|                              | <i>Astatotilapia velifer</i>     | Lake Victoria                          | Nagl et al. 2000 [25]                                  | n/a                           | AF213550                   | -        |        |       | LVS   |
|                              | <i>Astatotilapia velifer</i>     | Lake Victoria                          | Nagl et al. 2000 [25]                                  | n/a                           | AF213551                   | -        |        |       | LVS   |
|                              | <i>Astatotilapia velifer</i>     | Lake Victoria                          | Nagl et al. 2000 [25]                                  | n/a                           | AF213552                   | -        |        |       | LVS   |
|                              | <i>Astatotilapia velifer</i>     | Lake Victoria                          | Nagl et al. 2000 [25]                                  | n/a                           | AF213553                   | -        |        |       | LVS   |
|                              | <i>Aulonocara</i> sp "gold"      | Lake Malawi                            | Shaw et al. 2000 [62]                                  | n/a                           | AF398947                   | AF305286 | *      |       | LMF   |
|                              | <i>Cheilochromis euchilus</i>    | Lake Malawi                            | this study                                             | I. Kornfield                  | AY929979                   | AY930092 | *      |       | LMF   |
|                              | <i>Copadichromis virginalis</i>  | Lake Malawi                            | Shaw et al. 2000 [62]                                  | n/a                           | AF298944                   | AF305283 | *      |       | LMF   |
|                              | <i>Copadichromis virginalis</i>  | Lake Malawi                            | Shaw et al. 2000 [62]                                  | n/a                           | AF298943                   | AF305282 | *      |       | LMF   |
|                              | <i>Ctenochromis horei</i>        | Lake Tanganyika                        | this study                                             | C. Sturmbauer/W. Salzburger   | AY929987                   | AY930100 | *      |       | Tr    |
|                              | <i>Ctenochromis oligacanthus</i> | Congo River                            | Klett & Meyer 2002 [16]                                | n/a                           | -                          | AF416779 | *      |       | CSA   |
|                              | <i>Cyclopharynx fwae</i>         | Lake Fwa area, Congo Drainage          | Salzburger et al. 2002 [9]                             | n/a                           | AF400711                   | -        |        |       | CSA   |
|                              | <i>Cyclopharynx fwae</i>         | Lake Fwa area, Congo Drainage          | this study                                             | U. Schliewen                  | AY929986                   | AY930099 | *      |       | CSA   |
|                              | <i>Cyrtocara moorii</i>          | Lake Malawi                            | Lee et al. 1995 [80]                                   | n/a                           | U12554                     | -        |        |       | LMF   |
|                              | <i>Cyrtocara moorii</i>          | Lake Malawi                            | this study                                             | I. Kornfield                  | AY929976                   | AY930089 | *      |       | LMF   |
|                              | <i>Cyrtocara moorii</i>          | Lake Malawi                            | this study                                             | aquarium                      | AY930004                   | -        |        |       | LMF   |
|                              | <i>Diplotaxodon greenwoodi</i>   | Lake Malawi                            | Shaw et al. 2000 [62]                                  | n/a                           | AF298930                   | AF305269 | *      |       | LMF   |
|                              | <i>Diplotaxodon limnothrissa</i> | Lake Malawi                            | Shaw et al. 2000 [62]                                  | n/a                           | AF298922                   | AF305261 | *      |       | LMF   |

|                                          |                                     |                                     |                        |          |          |                   |
|------------------------------------------|-------------------------------------|-------------------------------------|------------------------|----------|----------|-------------------|
| <i>Haplochromis adolffrederici</i>       | Lake Kivu                           | Verheyen et al. 2003 [4]            | n/a                    | AY226715 | -        | LVS               |
| <i>Haplochromis astatodon</i>            | Lake Kivu                           | Verheyen et al. 2003 [4]            | n/a                    | AY226650 | -        | LVS               |
| <i>Haplochromis astatodon</i>            | Lake Kivu                           | Verheyen et al. 2003 [4]            | n/a                    | AY226669 | -        | LVS               |
| <i>Haplochromis astatodon</i>            | Lake Kivu                           | Verheyen et al. 2003 [4]            | n/a                    | AY226631 | -        | LVS               |
| <i>Haplochromis astatodon</i>            | Lake Kivu                           | Verheyen et al. 2003 [4]            | n/a                    | AY226697 | -        | LVS               |
| <i>Haplochromis astatodon</i>            | Lake Kivu                           | Verheyen et al. 2003 [4]            | n/a                    | AY226651 | -        | LVS               |
| <i>Haplochromis astatodon</i>            | Lake Kivu                           | Verheyen et al. 2003 [4]            | n/a                    | AY226632 | -        | LVS               |
| <i>Haplochromis astatodon</i>            | Lake Kivu                           | Verheyen et al. 2003 [4]            | n/a                    | AY226654 | -        | LVS               |
| <i>Haplochromis astatodon</i>            | Lake Kivu                           | Verheyen et al. 2003 [4]            | n/a                    | AY226692 | -        | LVS               |
| <i>Haplochromis astatodon</i>            | Lake Kivu                           | Verheyen et al. 2003 [4]            | n/a                    | AY226652 | -        | LVS               |
| <i>Haplochromis astatodon</i>            | Lake Kivu                           | Verheyen et al. 2003 [4]            | n/a                    | AY226691 | -        | LVS               |
| <i>Haplochromis bloeyti</i>              | Lukaware River, Kenya               | this study                          | L. De Vos (F2A-12/93)  | AY929953 | AY930058 | • EAR             |
| <i>Haplochromis crebridens</i>           | Lake Kivu                           | Verheyen et al. 2003 [4]            | n/a                    | AY226714 | -        | LVS               |
| <i>Haplochromis gracillor</i>            | Lake Kivu                           | Verheyen et al. 2003 [4]            | n/a                    | AY226790 | -        | EAR               |
| <i>Haplochromis gracillor</i>            | Lake Kivu                           | Verheyen et al. 2003 [4]/this study | E. Verheyen; K8        | AY226788 | AY930078 | • EAR             |
| <i>Haplochromis gracillor</i>            | Lake Kivu                           | Verheyen et al. 2003 [4]/this study | E. Verheyen; K9        | AY226789 | AY930079 | • EAR             |
| <i>Haplochromis graueri</i>              | Lake Kivu                           | Verheyen et al. 2003 [4]            | n/a                    | AY226648 | -        | LVS               |
| <i>Haplochromis graueri</i>              | Lake Kivu                           | Verheyen et al. 2003 [4]            | n/a                    | AY226668 | -        | LVS               |
| <i>Haplochromis graueri</i>              | Lake Kivu                           | Verheyen et al. 2003 [4]            | n/a                    | AY226649 | -        | LVS               |
| <i>Haplochromis insidiae</i>             | Lake Kivu                           | Verheyen et al. 2003 [4]/this study | E. Verheyen            | AY226675 | AY930077 | • LVS             |
| <i>Haplochromis insidiae</i>             | Lake Kivu                           | Verheyen et al. 2003 [4]            | n/a                    | AY226627 | -        | LVS               |
| <i>Haplochromis lividus</i>              | Lake Victoria                       | Nagl et al. 2000 [25]               | n/a                    | AF213523 | -        | LVS               |
| <i>Haplochromis microchrysomelas</i>     | Lake Kivu                           | Verheyen et al. 2003 [4]            | n/a                    | AY226695 | -        | LVS               |
| <i>Haplochromis nigroides/scheffersi</i> | Lake Kivu                           | Verheyen et al. 2003 [4]            | n/a                    | AY226629 | -        | LVS               |
| <i>Haplochromis obliquidens</i>          | Lake Victoria                       | this study                          | aquarium               | AY929984 | AY930097 | • LVS             |
| <i>Haplochromis occultidens</i>          | Lake Kivu                           | Verheyen et al. 2003 [4]            | n/a                    | AY226666 | -        | LVS               |
| <i>Haplochromis paludinosus</i>          | Nanganga, Burundi                   | this study                          | L. De Vos (T2-5/27/93) | AY929994 | AY930107 | • EAR             |
| <i>Haplochromis paucidens</i>            | Lake Kivu                           | Verheyen et al. 2003 [4]            | n/a                    | AY226687 | -        | LVS               |
| <i>Haplochromis paucidens</i>            | Lake Kivu                           | Verheyen et al. 2003 [4]            | n/a                    | AY226634 | -        | LVS               |
| <i>Haplochromis paucidens</i>            | Lake Kivu                           | Verheyen et al. 2003 [4]            | n/a                    | AY226712 | -        | LVS               |
| <i>Haplochromis paucidens</i>            | Lake Kivu                           | Verheyen et al. 2003 [4]            | n/a                    | AY226640 | -        | LVS               |
| <i>Haplochromis paucidens</i>            | Lake Kivu                           | Verheyen et al. 2003 [4]            | n/a                    | AY226689 | -        | LVS               |
| <i>Haplochromis paucidens</i>            | Lake Kivu                           | Verheyen et al. 2003 [4]            | n/a                    | AY226641 | -        | LVS               |
| <i>Haplochromis paucidens</i>            | Lake Kivu                           | Verheyen et al. 2003 [4]            | n/a                    | AY226693 | -        | LVS               |
| <i>Haplochromis paucidens</i>            | Lake Kivu                           | Verheyen et al. 2003 [4]            | n/a                    | AY226694 | -        | LVS               |
| <i>Haplochromis rubescens</i>            | Lake Kivu                           | Verheyen et al. 2003 [4]            | n/a                    | AY226717 | -        | LVS               |
| <i>Haplochromis sauvagei</i>             | Lake Victoria (Kisumu, Kenya)       | this study                          | L. De Vos (F2B-12/93)  | AY929954 | AY930059 | • II LVS          |
| <i>Haplochromis sauvagei</i>             | Lake Victoria                       | this study                          | A. Meyer, T44          | AY929958 | AY930063 | • I LVS           |
| <i>Haplochromis scheffersi</i>           | Lake Kivu                           | Verheyen et al. 2003 [4]            | n/a                    | AY226647 | -        | LVS               |
| <i>Haplochromis scheffersi</i>           | Lake Kivu                           | Verheyen et al. 2003 [4]            | n/a                    | AY226667 | -        | LVS               |
| <i>Haplochromis sp.</i>                  | Lake Mburo, Uganda                  | Verheyen et al. 2003 [4]/this study | E. Schraml (9796)      | AY226780 | AY930082 | • II LVS          |
| <i>Haplochromis sp.</i>                  | Lake Ruvihinda, Burundi             | this study                          | L. De Vos (T18-Aug 93) | AY930008 | -        | LVS               |
| <i>Haplochromis sp.</i>                  | Lake Victoria                       | this study                          | A. Meyer (V7-Feb 93)   | AY929960 | AY930065 | • I LVS           |
| <i>Haplochromis sp.</i>                  | Lake Victoria                       | this study                          | A. Meyer (V12-Feb 93)  | AY930009 | -        | LVS               |
| <i>Haplochromis sp.</i>                  | Lake Victoria                       | this study                          | A. Meyer (V24-Feb 93)  | AY930010 | -        | LVS               |
| <i>Haplochromis sp.</i>                  | Lake Victoria                       | this study                          | A. Meyer (V25-Feb 93)  | AY930011 | -        | LVS               |
| <i>Haplochromis sp.</i>                  | Lake Victoria                       | this study                          | A. Meyer (V29-Feb 93)  | AY930012 | -        | LVS               |
| <i>Haplochromis sp.</i>                  | Lake Victoria Region (L. Kanyaboli) | this study                          | R. Abila (R612-2002)   | AY930013 | -        | LVS               |
| <i>Haplochromis sp.</i>                  | Lake Victoria Region (L. Kanyaboli) | this study                          | R. Abila (R613-2002)   | AY930014 | -        | LVS               |
| <i>Haplochromis sp.</i>                  | Tanzania                            | this study                          | L. Seegers (92/12)     | AY930015 | -        | LVS               |
| <i>Haplochromis sp.</i>                  | Tanzania                            | this study                          | L. Seegers (93/11B)    | AY930016 | -        | EAR               |
| <i>Haplochromis sp.</i>                  | Tanzania                            | this study                          | L. De Vos (H62)        | AY929988 | AY930101 | • Tanzania IV LVS |
| <i>Haplochromis sp.</i>                  | Tanzania                            | this study                          | L. De Vos (H63)        | AY929989 | AY930102 | • Tanzania V LVS  |
| <i>Haplochromis sp.</i>                  | Tanzania                            | this study                          | L. Seegers (93/3)      | AY929990 | AY930103 | • Tanzania II EAR |
| <i>Haplochromis sp.</i>                  | Tanzania                            | this study                          | L. Seegers (93/40)     | AY929991 | AY930104 | • Tanzania I EAR  |
| <i>Haplochromis sp.</i>                  | Tanzania                            | this study                          | L. Seegers (93/8)      | AY929992 | AY930105 | • Tanzania II EAR |
| <i>Haplochromis sp.</i>                  | Upper Rusizi River, Burundi         | this study                          | L. De Vos (T13-Aug 93) | AY929983 | AY930096 | • LVS             |
| <i>Haplochromis sp.</i>                  | Lower Rusizi River, Burundi         | this study                          | L. De Vos (T9-Aug 93)  | AY930017 | -        | LVS               |
| <i>Haplochromis sp.</i>                  | Lake Victoria Region (L. Kanyaboli) | this study                          | R. Abila (R096-2002)   | AY930018 | -        | LVS               |
| <i>Haplochromis sp.</i>                  | Kazinga (Lakes Edward/George)       | Nagl et al. 2000 [25]               | n/a                    | AF213609 | -        | EAR               |

|                         |                           |                          |     |          |   |     |
|-------------------------|---------------------------|--------------------------|-----|----------|---|-----|
| <i>Haplochromis</i> sp. | Lake Albert               | Nagl et al. 2000 [25]    | n/a | AF213573 | - | LVS |
| <i>Haplochromis</i> sp. | Lake Albert               | Nagl et al. 2000 [25]    | n/a | AF213571 | - | LVS |
| <i>Haplochromis</i> sp. | Lake Albert               | Nagl et al. 2000 [25]    | n/a | AF213574 | - | LVS |
| <i>Haplochromis</i> sp. | Lake Albert               | Nagl et al. 2000 [25]    | n/a | AF213572 | - | LVS |
| <i>Haplochromis</i> sp. | Lake Babati               | Nagl et al. 2000 [25]    | n/a | AF213606 | - | EAR |
| <i>Haplochromis</i> sp. | Lake Bunyoni, Uganda      | Verheyen et al. 2003 [4] | n/a | AY226773 | - | LVS |
| <i>Haplochromis</i> sp. | Lake Bunyoni, Uganda      | Verheyen et al. 2003 [4] | n/a | AY226784 | - | LVS |
| <i>Haplochromis</i> sp. | Lake Chala, Tanzania      | Nagl et al. 2000 [25]    | n/a | AF213605 | - | EAR |
| <i>Haplochromis</i> sp. | Lake Cohoha, Burundi      | Verheyen et al. 2003 [4] | n/a | AY226725 | - | LVS |
| <i>Haplochromis</i> sp. | Lake Cohoha, Burundi      | Verheyen et al. 2003 [4] | n/a | AY226720 | - | LVS |
| <i>Haplochromis</i> sp. | Lake Cohoha, Burundi      | Verheyen et al. 2003 [4] | n/a | AY226726 | - | LVS |
| <i>Haplochromis</i> sp. | Lake Cohoha, Burundi      | Verheyen et al. 2003 [4] | n/a | AY226719 | - | LVS |
| <i>Haplochromis</i> sp. | Lake Edward               | Nagl et al. 2000 [25]    | n/a | AF213564 | - | LVS |
| <i>Haplochromis</i> sp. | Lake Edward               | Nagl et al. 2000 [25]    | n/a | AF213565 | - | LVS |
| <i>Haplochromis</i> sp. | Lake Edward               | Nagl et al. 2000 [25]    | n/a | AF213569 | - | LVS |
| <i>Haplochromis</i> sp. | Lake Edward               | Nagl et al. 2000 [25]    | n/a | AF213566 | - | LVS |
| <i>Haplochromis</i> sp. | Lake Edward               | Nagl et al. 2000 [25]    | n/a | AF213577 | - | LVS |
| <i>Haplochromis</i> sp. | Lake Edward               | Nagl et al. 2000 [25]    | n/a | AF213568 | - | LVS |
| <i>Haplochromis</i> sp. | Lake Edward               | Verheyen et al. 2003 [4] | n/a | AY226737 | - | LVS |
| <i>Haplochromis</i> sp. | Lake Edward               | Verheyen et al. 2003 [4] | n/a | AY226758 | - | LVS |
| <i>Haplochromis</i> sp. | Lake George               | Nagl et al. 2000 [25]    | n/a | AF213611 | - | EAR |
| <i>Haplochromis</i> sp. | Lake George               | Nagl et al. 2000 [25]    | n/a | AF213612 | - | EAR |
| <i>Haplochromis</i> sp. | Lake George               | Nagl et al. 2000 [25]    | n/a | AF213610 | - | EAR |
| <i>Haplochromis</i> sp. | Lake George               | Nagl et al. 2000 [25]    | n/a | AF213563 | - | LVS |
| <i>Haplochromis</i> sp. | Lake George               | Nagl et al. 2000 [25]    | n/a | AF213559 | - | LVS |
| <i>Haplochromis</i> sp. | Lake George               | Nagl et al. 2000 [25]    | n/a | AF213562 | - | LVS |
| <i>Haplochromis</i> sp. | Lake George               | Nagl et al. 2000 [25]    | n/a | AF213560 | - | LVS |
| <i>Haplochromis</i> sp. | Lake Manyara, Tanzania    | Nagl et al. 2000 [25]    | n/a | AF213607 | - | EAR |
| <i>Haplochromis</i> sp. | Lake Mburo, Uganda        | Verheyen et al. 2003 [4] | n/a | AY226749 | - | LVS |
| <i>Haplochromis</i> sp. | Lake Mugogo, Uganda       | Verheyen et al. 2003 [4] | n/a | AY226731 | - | LVS |
| <i>Haplochromis</i> sp. | Lake Nawampasa, Uganda    | Verheyen et al. 2003 [4] | n/a | AY226761 | - | LVS |
| <i>Haplochromis</i> sp. | Lake Nawampasa, Uganda    | Verheyen et al. 2003 [4] | n/a | AY226766 | - | LVS |
| <i>Haplochromis</i> sp. | Lake Nyamusingire, Uganda | Verheyen et al. 2003 [4] | n/a | AY226755 | - | LVS |
| <i>Haplochromis</i> sp. | Lake Victoria             | Verheyen et al. 2003 [4] | n/a | AY226779 | - | LVS |
| <i>Haplochromis</i> sp. | Lake Victoria             | Verheyen et al. 2003 [4] | n/a | AY226762 | - | LVS |
| <i>Haplochromis</i> sp. | Lake Victoria             | Verheyen et al. 2003 [4] | n/a | AY226727 | - | LVS |
| <i>Haplochromis</i> sp. | Lake Victoria             | Verheyen et al. 2003 [4] | n/a | AY226767 | - | LVS |
| <i>Haplochromis</i> sp. | Lake Victoria Region      | Nagl et al. 2000 [25]    | n/a | AF213588 | - | LVS |
| <i>Haplochromis</i> sp. | Lake Victoria Region      | Nagl et al. 2000 [25]    | n/a | AF213582 | - | LVS |
| <i>Haplochromis</i> sp. | Lake Victoria Region      | Nagl et al. 2000 [25]    | n/a | AF213583 | - | LVS |
| <i>Haplochromis</i> sp. | Lake Victoria Region      | Nagl et al. 2000 [25]    | n/a | AF213581 | - | LVS |
| <i>Haplochromis</i> sp. | Lakes Edward/George       | Nagl et al. 2000 [25]    | n/a | AF213557 | - | LVS |
| <i>Haplochromis</i> sp. | Lakes Edward/George       | Nagl et al. 2000 [25]    | n/a | AF213561 | - | LVS |
| <i>Haplochromis</i> sp. | Lakes Edward/George       | Nagl et al. 2000 [25]    | n/a | AF213558 | - | LVS |
| <i>Haplochromis</i> sp. | Lakes Edward/George       | Nagl et al. 2000 [25]    | n/a | AF213566 | - | LVS |
| <i>Haplochromis</i> sp. | Lakes Edward/George       | Nagl et al. 2000 [25]    | n/a | AF213584 | - | LVS |
| <i>Haplochromis</i> sp. | Lakes Edward/George       | Nagl et al. 2000 [25]    | n/a | AF213570 | - | LVS |
| <i>Haplochromis</i> sp. | Lakes Edward/George       | Nagl et al. 2000 [25]    | n/a | AF213586 | - | LVS |
| <i>Haplochromis</i> sp. | Lakes Edward/George       | Nagl et al. 2000 [25]    | n/a | AF213585 | - | LVS |
| <i>Haplochromis</i> sp. | Lakes Edward/George       | Nagl et al. 2000 [25]    | n/a | AF213587 | - | LVS |
| <i>Haplochromis</i> sp. | Lakes Lutoto/Edward       | Nagl et al. 2000 [25]    | n/a | AF213567 | - | LVS |
| <i>Haplochromis</i> sp. | Lakes Lutoto/Edward       | Nagl et al. 2000 [25]    | n/a | AF213575 | - | LVS |
| <i>Haplochromis</i> sp. | Lakes Lutoto/Edward       | Nagl et al. 2000 [25]    | n/a | AF213576 | - | LVS |
| <i>Haplochromis</i> sp. | Lakes Nshere/George       | Nagl et al. 2000 [25]    | n/a | AF213579 | - | LVS |
| <i>Haplochromis</i> sp. | Lakes Nshere/George       | Nagl et al. 2000 [25]    | n/a | AF213587 | - | LVS |
| <i>Haplochromis</i> sp. | Lakes Nshere/George       | Nagl et al. 2000 [25]    | n/a | AF213580 | - | LVS |
| <i>Haplochromis</i> sp. | Lupa River, Tanzania      | Nagl et al. 2000 [25]    | n/a | AF213595 | - | EAR |
| <i>Haplochromis</i> sp. | Malagarazi River          | Nagl et al. 2000 [25]    | n/a | AF213590 | - | EAR |
| <i>Haplochromis</i> sp. | Malagarazi River          | Nagl et al. 2000 [25]    | n/a | AF213591 | - | EAR |
| <i>Haplochromis</i> sp. | Malagarazi River          | Nagl et al. 2000 [25]    | n/a | AF213592 | - | EAR |
| <i>Haplochromis</i> sp. | Malagarazi River          | Nagl et al. 2000 [25]    | n/a | AF213589 | - | EAR |

|                                                     |                                     |                                         |                               |          |          |     |
|-----------------------------------------------------|-------------------------------------|-----------------------------------------|-------------------------------|----------|----------|-----|
| <i>Haplochromis</i> sp.                             | Malagarazi River                    | Nagl et al. 2000 [25]                   | n/a                           | AF213593 | -        | EAR |
| <i>Haplochromis</i> sp.                             | Malagarazi River                    | Nagl et al. 2000 [25]                   | n/a                           | AF213594 | -        | EAR |
| <i>Haplochromis</i> sp.                             | Malagarazi River                    | Nagl et al. 2000 [25]                   | n/a                           | AF213613 | -        | EAR |
| <i>Haplochromis</i> sp.                             | Malagarazi River                    | Nagl et al. 2000 [25]                   | n/a                           | AF213608 | -        | EAR |
| <i>Haplochromis</i> sp.                             | Malagarazi River                    | Nagl et al. 2000 [25]                   | n/a                           | AF213614 | -        | EAR |
| <i>Haplochromis</i> sp.                             | Myunga River, Tanzania              | Nagl et al. 2000 [25]                   | n/a                           | AF213556 | -        | EAR |
| <i>Haplochromis</i> sp.                             | Pangani River, Tanzania             | Nagl et al. 2000 [25]                   | n/a                           | AF213600 | -        | EAR |
| <i>Haplochromis</i> sp.                             | Pangani River, Tanzania             | Nagl et al. 2000 [25]                   | n/a                           | AF213599 | -        | EAR |
| <i>Haplochromis</i> sp.                             | Pangani River, Tanzania             | Nagl et al. 2000 [25]                   | n/a                           | AF213604 | -        | EAR |
| <i>Haplochromis</i> sp.                             | Piti River, Tanzania                | Nagl et al. 2000 [25]                   | n/a                           | AF213598 | -        | EAR |
| <i>Haplochromis</i> sp.                             | Piti River, Tanzania                | Nagl et al. 2000 [25]                   | n/a                           | AF213596 | -        | EAR |
| <i>Haplochromis</i> sp.                             | Piti River, Tanzania                | Nagl et al. 2000 [25]                   | n/a                           | AF213597 | -        | EAR |
| <i>Haplochromis</i> sp.                             | Victoria Nile River                 | Verheyen et al. 2003 [4]                | n/a                           | AY226734 | -        | LVS |
| <i>Haplochromis</i> sp.                             | Wogo River/Lake Rukwa               | Nagl et al. 2000 [25]                   | n/a                           | AF213602 | -        | EAR |
| <i>Haplochromis</i> sp.                             | Wogo River/Lake Rukwa               | Nagl et al. 2000 [25]                   | n/a                           | AF213603 | -        | EAR |
| <i>Haplochromis</i> sp.                             | Wogo River/Lake Rukwa               | Nagl et al. 2000 [25]                   | n/a                           | AF213601 | -        | EAR |
| <i>Haplochromis</i> sp.                             | Wogo River/Lake Rukwa               | Nagl et al. 2000 [25]                   | n/a                           | AF213555 | -        | EAR |
| <i>Haplochromis</i> sp. "Dwarf Big Eye"             | Lake Victoria Region (L. Kanyaboli) | this study                              | R. Abila (R280-2002)          | AY929968 | AY930074 | LVS |
| <i>Haplochromis</i> sp. "Dwarf Big Eye"             | Lake Victoria Region (L. Kanyaboli) | this study                              | R. Abila (R193-2002)          | AY930042 | -        | LVS |
| <i>Haplochromis</i> sp. "Dwarf Big Eye"             | Lake Victoria Region (L. Kanyaboli) | this study                              | R. Abila (R048-2002)          | AY930043 | -        | LVS |
| <i>Haplochromis</i> sp. "oblique mouth"             | Lake Cohoha, Burundi                | this study                              | L. De Vos (T10-Aug 93)        | AY930041 | -        | LVS |
| <i>Haplochromis</i> sp. "rockkribensis"             | Lake Victoria                       | this study                              | O. Seehausen                  | AY390039 | -        | LVS |
| <i>Haplochromis</i> sp. "rockkribensis"             | Lake Victoria                       | this study                              | O. Seehausen                  | AY390040 | -        | LVS |
| <i>Haplochromis</i> sp. "rockkribensis"             | Lake Victoria                       | Nagl et al. 2000 [25]                   | n/a                           | AF213541 | -        | LVS |
| <i>Haplochromis</i> sp. "rockkribensis"             | Lake Victoria                       | Nagl et al. 2000 [25]                   | n/a                           | AF213554 | -        | LVS |
| <i>Haplochromis</i> sp. "rockkribensis"             | Lake Victoria                       | Nagl et al. 2000 [25]                   | n/a                           | AF213542 | -        | LVS |
| <i>Haplochromis</i> sp. "small red"                 | Lake Cohoha, Burundi                | this study                              | L. De Vos (T11-Aug 93)        | AY930036 | -        | LVS |
| <i>Haplochromis</i> sp. "small red"                 | Lake Rweru, Burundi                 | this study                              | L. De Vos (T16-Aug 93)        | AY930038 | -        | LVS |
| <i>Haplochromis</i> sp. "thick lips"                | Lake Cohoha, Burundi                | this study                              | L. De Vos (T12-93)            | AY930037 | -        | LVS |
| <i>Haplochromis</i> sp. <i>crebridens/olivaceus</i> | Lake Kivu                           | Verheyen et al. 2003 [4]                | n/a                           | AY226623 | -        | LVS |
| <i>Haplochromis</i> sp. <i>crebridens/olivaceus</i> | Lake Kivu                           | Verheyen et al. 2003 [4]                | n/a                           | AY226704 | -        | LVS |
| <i>Haplochromis</i> sp. <i>crebridens/olivaceus</i> | Lake Kivu                           | Verheyen et al. 2003 [4]                | n/a                           | AY226646 | -        | LVS |
| <i>Haplochromis</i> sp. <i>crebridens/olivaceus</i> | Lake Kivu                           | Verheyen et al. 2003 [4]                | n/a                           | AY226645 | -        | LVS |
| <i>Haplochromis</i> sp. <i>crebridens/olivaceus</i> | Lake Kivu                           | Verheyen et al. 2003 [4]                | n/a                           | AY226642 | -        | LVS |
| <i>Haplochromis</i> sp. <i>crebridens/olivaceus</i> | Lake Kivu                           | Verheyen et al. 2003 [4]                | n/a                           | AY226670 | -        | LVS |
| <i>Haplochromis</i> sp. <i>nov</i>                  | Kisangani (Lualaba River), DR Congo | this study                              | L. De Vos (6/13/95)           | AY929957 | AY930062 | CSA |
| <i>Haplochromis</i> sp. <i>velvet black</i>         | Lake Victoria                       | Nagl et al. 2000 [25]                   | n/a                           | AF213543 | -        | LVS |
| <i>Haplochromis squamipinnis</i>                    | Lake Edward                         | Verheyen et al. 2003 [4]/this study     | E. Schraml (9813)             | AY226747 | AY930083 | LVS |
| <i>Haplochromis stappersi</i>                       | Malagarazi River                    | this study                              | L. De Vos (5-6/25/92)         | AY929941 | AY930046 | LVS |
| <i>Labetropheus trevawasae</i>                      | Lake Malawi                         | Nagl et al. 2000 [25]                   | n/a                           | AF213623 | -        | LMF |
| <i>Lethrinops auritus</i>                           | Lake Malawi                         | Lee et al. 1995/Kocher et al. 1995 [15] | n/a                           | U12551   | U07252   | LMF |
| <i>Lethrinops furcifer</i>                          | Lake Malawi                         | Shaw et al. 2000 [62]                   | n/a                           | AF298977 | AF305316 | LMF |
| <i>Lethrinops longipinnis</i>                       | Lake Malawi                         | Shaw et al. 2000 [62]                   | n/a                           | AF298956 | AF305296 | LMF |
| <i>Lipochromis maxillaris</i>                       | Lake Victoria Region (L. Kanyaboli) | this study                              | R. Abila (R542-2002)          | AY930034 | -        | LVS |
| <i>Lipochromis melanopterus</i>                     | Lake Victoria                       | Nagl et al. 2000 [25]                   | n/a                           | AF213527 | -        | LVS |
| <i>Macropheurodus bicolor</i>                       | Lake Victoria                       | this study                              | A. Meyer (Mb2-Feb 33); T47    | AY930007 | -        | LVS |
| <i>Melanochromis auratus</i>                        | Lake Malawi                         | this study                              | aquarium                      | AY929964 | AY930069 | LMF |
| <i>Neochromis nigricans</i>                         | Lake Victoria                       | Nagl et al. 2000 [25]                   | n/a                           | AF213528 | -        | LVS |
| <i>Neochromis nigricans</i>                         | Lake Victoria                       | Nagl et al. 2000 [25]                   | n/a                           | AF213545 | -        | LVS |
| <i>Neochromis nigricans</i>                         | Lake Victoria                       | Nagl et al. 2000 [25]                   | n/a                           | AF213544 | -        | LVS |
| <i>Neochromis nigricans</i>                         | Lake Victoria (Makobe Island)       | this study                              | O. Seehausen (Ma 8/1-Dec. 93) | AY930006 | -        | LVS |
| <i>Neochromis nigricans</i>                         | Lake Victoria (Nane Island)         | this study                              | L. De Vos (F2C-12/93)         | AY930005 | -        | LVS |
| <i>Orthochromis kasuluensis</i>                     | Mgandazi River, Tanzania            | this study                              | L. De Vos (4C)                | AY930031 | -        | MO  |
| <i>Orthochromis kasuluensis</i>                     | Tanzania                            | this study                              | L. De Vos (T2-July 94)        | AY929944 | AY930049 | MO  |
| <i>Orthochromis luichensis</i>                      | Mkuti River, Luiche Basin, Tanzania | this study                              | L. De Vos (T94/3)             | AY929947 | AY930052 | MO  |
| <i>Orthochromis malagaraziensis</i>                 | Malagarazi River                    | Salzburger et al. 2002 [9]              | n/a                           | AF400714 | AF398232 | MO  |
| <i>Orthochromis malagaraziensis</i>                 | Nyarungunga River, Burundi          | this study                              | L. De Vos (7-2/19/93)         | AY929949 | AY930054 | MO  |
| <i>Orthochromis malagaraziensis</i>                 | Nyarungunga River, Burundi          | this study                              | L. De Vos (T5-5/28/93)        | AY929951 | AY930056 | MO  |
| <i>Orthochromis mazimeroensis</i>                   | Nanganga, Burundi                   | this study                              | L. De Vos (T1-5/27/93)        | AY930032 | -        | MO  |
| <i>Orthochromis mazimeroensis</i>                   | Mazimero River, Burundi             | this study                              | L. De Vos (T3-5/27/93)        | AY929948 | AY930053 | MO  |

|               |                                         |                                     |                                                    |                                 |          |          |   |              |
|---------------|-----------------------------------------|-------------------------------------|----------------------------------------------------|---------------------------------|----------|----------|---|--------------|
|               | <i>Orthochromis mosoensis</i>           | Ruisseau Gytinya, Burundi           | this study                                         | L. De Vos (T7-5/28/93)          | AY930033 | -        | • | MO           |
|               | <i>Orthochromis mosoensis</i>           | Ruisseau Gytinya, Burundi           | this study                                         | L. De Vos (T8-5/28/93)          | AY929950 | AY930055 | • | MO           |
|               | <i>Orthochromis polyacanthus</i>        | Congo River                         | Salzburger et al. 2002 [9]                         | n/a                             | AF400712 | AF398231 | • | CSA          |
|               | <i>Orthochromis rubrolabialis</i>       | Tanzania                            | this study                                         | L. Seegers (TZ94-108)           | AY929946 | AY930051 | • | MO           |
|               | <i>Orthochromis rugufuensis</i>         | Rugufu River, Tanzania              | this study                                         | L. Seegers (TZ94-121)           | AY929945 | AY930050 | • | MO           |
|               | <i>Orthochromis uvinzae</i>             | Malagarazi River                    | this study                                         | L. Seegers (TZ94-112b)          | AY929943 | AY930048 | • | MO           |
|               | <i>Paralabidochromis beadlei</i>        | Lake Victoria                       | Nagl et al. 2000 [25]                              | n/a                             | AF213519 | -        | • | LVS          |
|               | <i>Paralabidochromis chilotes</i>       | Lake Victoria                       | Nagl et al. 2000 [25]                              | n/a                             | AF213540 | -        | • | LVS          |
|               | <i>Paralabidochromis chilotes</i>       | Lake Victoria                       | Nagl et al. 2000 [25]                              | n/a                             | AF213525 | -        | • | LVS          |
|               | <i>Paralabidochromis chilotes</i>       | Lake Victoria                       | Nagl et al. 2000 [25]                              | n/a                             | AF213539 | -        | • | LVS          |
|               | <i>Paralabidochromis plagiodon</i>      | Lake Victoria                       | Nagl et al. 2000 [25]                              | n/a                             | AF213546 | -        | • | LVS          |
|               | <i>Paralabidochromis plagiodon</i>      | Lake Victoria                       | Nagl et al. 2000 [25]                              | n/a                             | AF213529 | -        | • | LVS          |
|               | <i>Paralabidochromis plagiodon</i>      | Lake Victoria                       | Nagl et al. 2000 [25]                              | n/a                             | AF213547 | -        | • | LVS          |
|               | <i>Pharyngochromis acuticeps</i>        | Zambezi River, Zambia               | this study                                         | C. Katongo/C. Sturmbauer        | AY929981 | AY930094 | • | CSA          |
|               | <i>Platytaeniodes degeni</i>            | Lake Victoria                       | this study                                         | A. Meyer (Pd1)                  | AY929959 | AY930064 | • | LVS          |
|               | <i>Platytaeniodes degeni</i>            | Lake Victoria                       | this study                                         | A. Meyer (Pd2)                  | AY930030 | -        | • | LVS          |
|               | <i>Prognothochromis venator</i>         | Lake Victoria                       | Nagl et al. 2000 [25]                              | n/a                             | AF213537 | -        | • | LVS          |
|               | <i>Psammochromis riponians</i>          | Lake Victoria                       | Nagl et al. 2000 [25]                              | n/a                             | AF213530 | -        | • | LVS          |
|               | <i>Pseudocranilabrus multicolor I</i>   | Lake Victoria Region                | Salzburger et al. 2002 [9]                         | n/a                             | AF400713 | AF398233 | • | LVS          |
|               | <i>Pseudocranilabrus multicolor V</i>   | Lake Victoria Region (L. Kanyaboli) | this study                                         | R. Abila (R082-2002)            | AY929965 | AY930070 | • | victoriae Ps |
|               | <i>Pseudocranilabrus multicolor VII</i> | Lake Victoria                       | this study                                         | A. Meyer; T31                   | AY930029 | -        | • | LVS          |
|               | <i>Pseudocrenilabrus multicolor</i>     | Tanzania                            | this study                                         | L. Seegers (91/137)             | AY929993 | AY930106 | • | Ps           |
|               | <i>Pseudocrenilabrus multicolor III</i> | Lake Victoria Region (L. Kanyaboli) | this study                                         | R. Abila (R084-2002)            | AY930028 | -        | • | Ps           |
|               | <i>Pseudocrenilabrus multicolor IV</i>  | Lake Victoria Region (L. Kanyaboli) | this study                                         | R. Abila (R083-2002)            | AY930027 | -        | • | Ps           |
|               | <i>Pseudocrenilabrus philander</i>      | Zambezi River                       | this study                                         | aquarium                        | AY929942 | AY930047 | • | Ps           |
|               | <i>Pseudocrenilabrus multicolor VI</i>  | Lake Victoria Region (L. Kanyaboli) | this study                                         | R. Abila (R081-2002)            | AY930026 | -        | • | Ps           |
|               | <i>Pseudotropheus livingstonii</i>      | Lake Malawi                         | this study                                         | I. Kornfield                    | AY929956 | AY930061 | • | LMF          |
|               | <i>Pseudotropheus msobo</i>             | Lake Malawi                         | Nagl et al. 2000 [25]                              | n/a                             | AF213622 | -        | • | LMF          |
|               | <i>Pseudotropheus zebra</i>             | Lake Malawi                         | this study                                         | aquarium                        | AY930025 | -        | • | LMF          |
|               | <i>Pseudotropheus zebra "patricky"</i>  | Lake Malawi                         | this study                                         | aquarium                        | AY930024 | -        | • | LMF          |
|               | <i>Ptyochromis sauvagei</i>             | Lake Victoria                       | Nagl et al. 2000 [25]                              | n/a                             | AF213549 | -        | • | LVS          |
|               | <i>Ptyochromis sauvagei</i>             | Lake Victoria                       | Nagl et al. 2000 [25]                              | n/a                             | AF213531 | -        | • | LVS          |
|               | <i>Ptyochromis xenognathus</i>          | Lake Victoria                       | Nagl et al. 2000 [25]                              | n/a                             | AF213532 | -        | • | LVS          |
|               | <i>Ptyochromis xenognathus</i>          | Lake Victoria                       | Nagl et al. 2000 [25]                              | n/a                             | AF213535 | -        | • | LVS          |
|               | <i>Ptyochromis xenognathus</i>          | Lake Victoria                       | Nagl et al. 2000 [25]                              | n/a                             | AF213533 | -        | • | LVS          |
|               | <i>Ptyochromis xenognathus</i>          | Lake Victoria                       | Nagl et al. 2000 [25]                              | n/a                             | AF213534 | -        | • | LVS          |
|               | <i>Ptyochromis xenognathus</i>          | Lake Victoria                       | this study                                         | A. Meyer (2-93)                 | AY930035 | -        | • | LVS          |
|               | <i>Rhamphochromis esox</i>              | Lake Malawi                         | Shaw et al. 2000 [62]                              | n/a                             | AF298913 | AF305252 | • | LMF          |
|               | <i>Rhamphochromis macrophthalmus</i>    | Lake Malawi                         | Shaw et al. 2000 [62]                              | n/a                             | AF298911 | AF305250 | • | LMF          |
|               | <i>Sargochromis giardi</i>              | Zambezi River, Zambia               | this study                                         | C. Katongo/C. Sturmbauer (2647) | AY929985 | AY930098 | • | CSA          |
|               | <i>Schwetochromis stomsi</i>            | Kisangani (Lualaba River), DR Congo | this study                                         | L. De Vos (5/5/95)              | AY929952 | AY930057 | • | CSA          |
|               | <i>Serranochromis sp.</i>               | Lake Mweru-Wantipa, Zambia          | Verheyen et al. 2003 [4]/this study                | T. Reuter/E. Schraml (9793)     | AY226792 | AY930081 | • | CSA          |
|               | <i>Thoracochromis brauschi</i>          | Lake Fwa area, Congo Drainage       | this study                                         | aquarium                        | AY929982 | AY930095 | • | CSA          |
|               | <i>Thoracochromis brauschi</i>          | Lake Fwa area, Congo Drainage       | this study                                         | R. Paul/E. Schraml (9792)       | AY226791 | AY930080 | • | CSA          |
|               | <i>Tyrannochromis nigriventer</i>       | Lake Malawi                         | Shaw et al. 2000 [62]                              | n/a                             | AF298968 | AF305307 | • | LMF          |
|               | <i>Xystichromis phytophagus</i>         | Lake Victoria Region (L. Kanyaboli) | this study                                         | R. Abila (R670-2002)            | AY929970 | AY930076 | • | LVS          |
|               | <i>Yssichromis laparogramma</i>         | Lake Victoria                       | Nagl et al. 2000 [25]                              | n/a                             | AF213520 | -        | • | LVS          |
|               | <i>Yssichromis laparogramma</i>         | Lake Victoria                       | Nagl et al. 2000 [25]                              | n/a                             | AF213521 | -        | • | LVS          |
| Lamprologini  | <i>Julidochromis marlieri</i>           | Lake Tanganyika                     | Salzburger et al. 2002 [9]                         | n/a                             | AF400717 | AF398230 | • | LT           |
|               | <i>Lamprologus callipterus</i>          | Lake Tanganyika                     | Salzburger et al. 2002 [9]                         | n/a                             | AF400718 | AF398226 | • | LT           |
|               | <i>Lamprologus mocquardi</i>            | Congo River                         | Salzburger et al. 2002 [9]                         | n/a                             | AF400720 | AF398225 | • | LT           |
|               | <i>Neolamprologus brichardi</i>         | Lake Tanganyika                     | Salzburger et al. 2002 [9]                         | n/a                             | AF400721 | AF398227 | • | LT           |
|               | <i>Telmatochromis bifrenatus</i>        | Lake Tanganyika                     | Salzburger et al. 2002 [9]                         | n/a                             | AF400724 | AF398228 | • | LT           |
| Limnochromini | <i>Gnathochromis pfefferi</i>           | Lake Tanganyika                     | Salzburger et al. 2002 [9]/Kocher et al. 1995 [15] | n/a                             | AF400727 | U07248   | • | LT           |
|               | <i>Limnochromis auritus</i>             | Lake Tanganyika                     | Salzburger et al. 2002 [9]                         | n/a                             | AF400728 | AF398246 | • | LT           |
|               | <i>Triglachromis otostigma</i>          | Lake Tanganyika                     | Salzburger et al. 2002 [9]                         | n/a                             | AF400729 | AF398217 | • | LT           |
| Perissodini   | <i>Perissodus microlepis</i>            | Lake Tanganyika                     | Salzburger et al. 2002 [9]                         | n/a                             | AF400730 | AF398222 | • | LT           |
|               | <i>Plecodus straeleni</i>               | Lake Tanganyika                     | Salzburger et al. 2002 [9]                         | n/a                             | AF400731 | AF398221 | • | LT           |
| Tilapiini     | <i>Boulengerochromis microlepis</i>     | Lake Tanganyika                     | this study/Klett & Meyer 2002 [16]                 | n/a                             | AY929939 | AF317229 | • | LT           |
|               | <i>Oreochromis tanganyicae</i>          | Lake Tanganyika                     | this study/Salzburger et al. 2002 [9]              | n/a                             | AY929940 | AF317240 | • | LT           |

|           |                                   |                 |                                                    |                  |          |          |   |     |    |
|-----------|-----------------------------------|-----------------|----------------------------------------------------|------------------|----------|----------|---|-----|----|
| Tropheini | <i>Cyphotilapia frontosa</i>      | Lake Tanganyika | Salzburger et al. 2002 [9]/Kocher et al. 1995 [15] | n/a              | AF400732 | U07247   | • |     | Tr |
|           | <i>Lobochilotes labiatus</i>      | Lake Tanganyika | Salzburger et al. 2002 [9]/Kocher et al. 1995 [15] | n/a              | AF400733 | U07254   | • |     | Tr |
|           | <i>Petrochromis macrognaathus</i> | Lake Tanganyika | this study                                         | J. Snoeks        | AY929963 | AY930068 | • |     | Tr |
|           | <i>Petrochromis orthognathus</i>  | Lake Tanganyika | this study                                         | E. Verheyen      | AY930023 | -        |   |     | Tr |
|           | <i>Simochromis diagramma</i>      | Lake Tanganyika | this study                                         | E. Verheyen      | AY929974 | AY930087 | • |     | Tr |
|           | <i>Simochromis marginatus</i>     | Lake Tanganyika | this study                                         | E. Verheyen      | AY929975 | AY930088 | • |     | Tr |
|           | <i>Tropheus brichardi</i>         | Lake Tanganyika | this study                                         | E. Verheyen; M85 | AY929973 | AY930086 |   |     | Tr |
|           | <i>Tropheus brichardi</i>         | Lake Tanganyika | this study                                         | E. Verheyen; M87 | AY930022 | -        | • |     | Tr |
|           | <i>Tropheus duboisi</i>           | Lake Tanganyika | this study                                         | E. Verheyen; M7  | AY929972 | AY930085 |   |     | Tr |
|           | <i>Tropheus duboisi</i>           | Lake Tanganyika | this study                                         | E. Verheyen; M9  | AY930021 | -        | • |     | Tr |
|           | <i>Tropheus moorii I</i>          | Lake Tanganyika | this study                                         | E. Verheyen; T66 | AY929961 | AY930066 | • | I   | Tr |
|           | <i>Tropheus moorii II</i>         | Lake Tanganyika | this study                                         | E. Verheyen; T67 | AY929962 | AY930067 | • | II  | Tr |
|           | <i>Tropheus moorii III</i>        | Lake Tanganyika | this study                                         | E. Verheyen; 97  | AY929978 | AY930091 | • | III | Tr |
|           | <i>Tropheus moorii IV</i>         | Lake Tanganyika | this study                                         | E. Verheyen; 116 | AY929980 | AY930093 | • | IV  | Tr |
|           | <i>Tropheus moorii V</i>          | Lake Tanganyika | this study                                         | E. Verheyen; 93  | AY930020 | -        |   |     | Tr |
|           | <i>Tropheus polli</i>             | Lake Tanganyika | this study                                         | E. Verheyen      | AY929971 | AY930084 | • |     | Tr |
|           | <i>Tropheus sp.</i>               | Lake Tanganyika | this study                                         | E. Verheyen      | AY930019 | -        |   |     | Tr |
